# Supplementary material
Source: PubMed Central journal article supplement (PMC7611603)
Supplement: EMS133108-supplement-SF2.pdf [file EMS133108-supplement-SF2.pdf]

**Supplementary Figure S2. Crude and adjusted odds ratio of GDM associated with height (per 5-cm increment) among all women and when stratified by ethnic groups in the GUSTO cohort.**

| <b>GDM-1999<br/>(GUSTO only)</b> | <b>n</b>     | <b>P-int<sup>†</sup></b> | <b>Crude OR (95% CI)</b> | <b>aOR (95% CI)<sup>†</sup></b> |
|----------------------------------|--------------|--------------------------|--------------------------|---------------------------------|
| <b>All</b>                       | <b>1,100</b> | <b>0.854</b>             | <b>0.93 (0.81, 1.06)</b> | <b>0.79 (0.68, 0.93)**</b>      |
| Chinese                          | 628          |                          | 0.95 (0.80, 1.13)        | 0.82 (0.68, 1.00)*              |
| Malay                            | 276          |                          | 0.69 (0.48, 0.99)*       | 0.63 (0.43, 0.94)*              |
| Indian                           | 196          |                          | 0.90 (0.67, 1.21)        | 0.81 (0.58, 1.14)               |

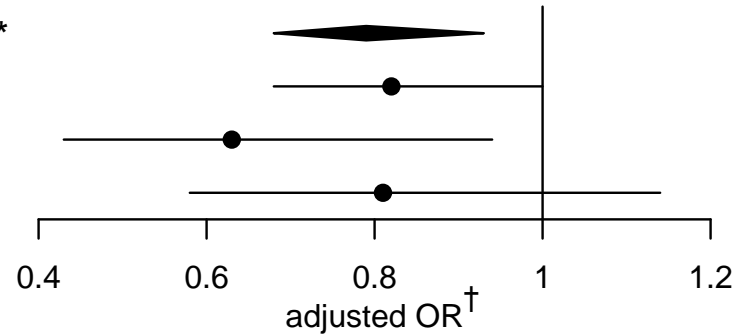

<sup>†</sup>Adjusted for maternal age, booking weight (and ethnicity for “All” women analyses).  
P-interaction denotes the P value for the interaction effects between height and ethnicity on GDM.

\*P<0.05; \*\*P<0.01.

aOR, adjusted odds ratio; GDM-1999, gestational diabetes diagnosed by WHO 1999 criteria; OR, odds ratio; P-int, P-interaction
