# Supplementary material
Source: PubMed Central journal article supplement (PMC7611603)
Supplement: EMS133108-supplement-sf3.pdf [file EMS133108-supplement-sf3.pdf]

**Supplementary Figure S3. Crude and adjusted beta coefficients of plasma glucose (mmol/L) associated with height (per-5cm increment) among all women and when stratified by ethnic groups for the individual cohorts.**

| <b>FPG</b>     | <b>n</b>     | <b>P-int<sup>†</sup></b> | <b>Crude <math>\beta</math> (95% CI)</b> | <b>a<math>\beta</math> (95% CI)<sup>†</sup></b> |
|----------------|--------------|--------------------------|------------------------------------------|-------------------------------------------------|
| <b>(GUSTO)</b> |              |                          |                                          |                                                 |
| <b>All</b>     | <b>1,100</b> | <b>0.482</b>             | <b>0.014 (-0.011, 0.04)</b>              | <b>-0.021 (-0.047, 0.006)</b>                   |
| Chinese        | 628          |                          | 0.025 (-0.006, 0.056)                    | -0.023 (-0.056, 0.009)                          |
| Malay          | 276          |                          | 0.024 (-0.039, 0.087)                    | 0.001 (-0.064, 0.066)                           |
| Indian         | 196          |                          | -0.014 (-0.073, 0.044)                   | -0.055 (-0.115, 0.004)                          |
| <b>2hPG</b>    |              |                          |                                          |                                                 |
| <b>(GUSTO)</b> |              |                          |                                          |                                                 |
| <b>All</b>     | <b>1,100</b> | <b>0.662</b>             | <b>-0.089 (-0.167, -0.011)*</b>          | <b>-0.183 (-0.264, -0.102)***</b>               |
| Chinese        | 628          |                          | -0.078 (-0.179, 0.023)                   | -0.181 (-0.288, -0.073)***                      |
| Malay          | 276          |                          | -0.183 (-0.353, -0.012)*                 | -0.217 (-0.388, -0.046)*                        |
| Indian         | 196          |                          | -0.139 (-0.325, 0.047)                   | -0.166 (-0.357, 0.026)                          |
| <b>FPG</b>     |              |                          |                                          |                                                 |
| <b>(NUH)</b>   |              |                          |                                          |                                                 |
| <b>All</b>     | <b>4,068</b> | <b>0.107</b>             | <b>0.012 (0, 0.024)*</b>                 | <b>-0.015 (-0.027, -0.003)*</b>                 |
| Chinese        | 1,601        |                          | 0.013 (-0.003, 0.029)                    | -0.018 (-0.034, -0.002)*                        |
| Malay          | 1,150        |                          | 0.041 (0.015, 0.066)**                   | 0.009 (-0.018, 0.035)                           |
| Indian         | 658          |                          | 0.008 (-0.025, 0.042)                    | -0.023 (-0.058, 0.011)                          |
| <b>2hPG</b>    |              |                          |                                          |                                                 |
| <b>(NUH)</b>   |              |                          |                                          |                                                 |
| <b>All</b>     | <b>4,068</b> | <b>&lt;0.001</b>         | <b>-0.101 (-0.141, -0.062)***</b>        | <b>-0.169 (-0.21, -0.127)***</b>                |
| Chinese        | 1,601        |                          | -0.056 (-0.120, 0.007)                   | -0.112 (-0.178, -0.047)***                      |
| Malay          | 1,150        |                          | -0.051 (-0.127, 0.025)                   | -0.095 (-0.173, -0.017)*                        |
| Indian         | 658          |                          | -0.200 (-0.313, -0.087)**                | -0.271 (-0.387, -0.155)***                      |

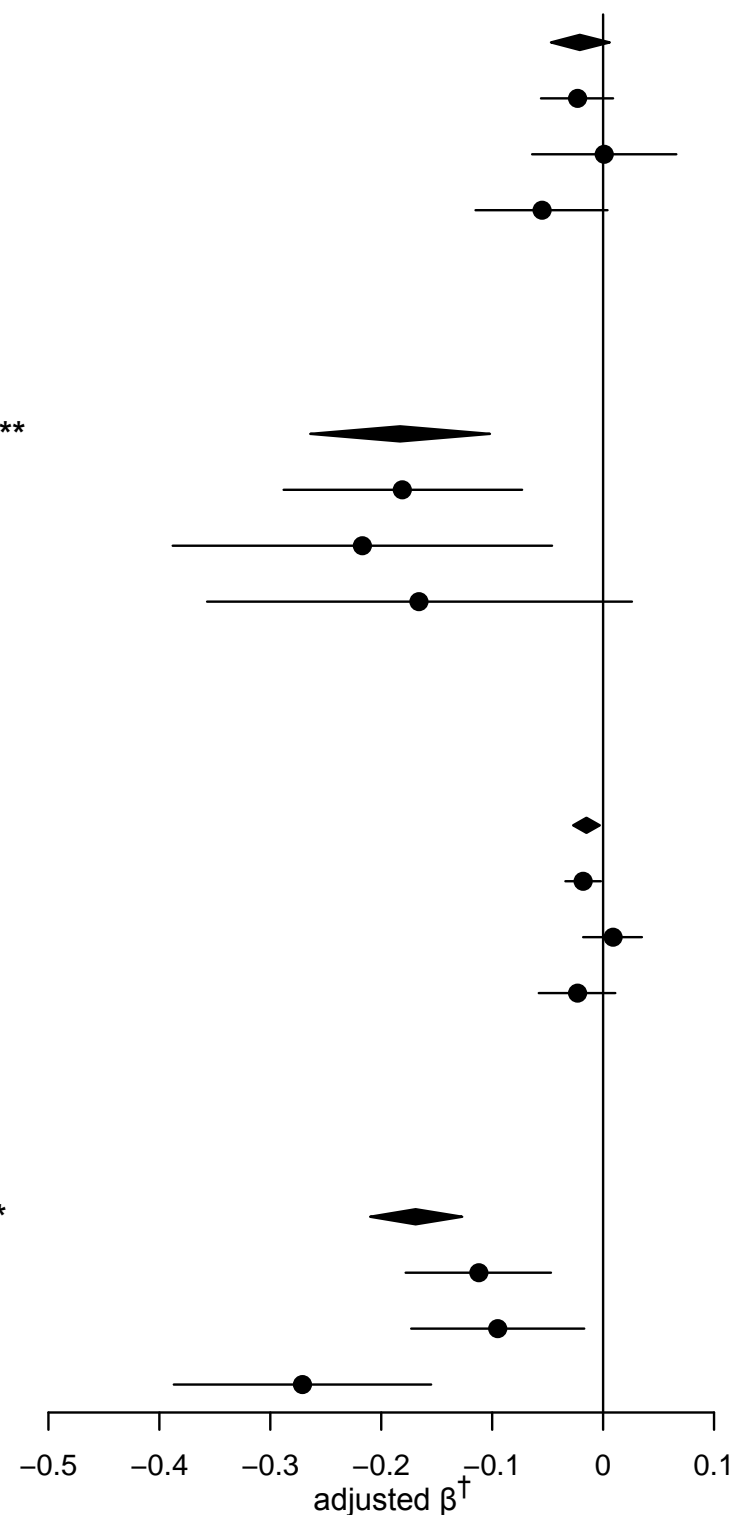

<sup>†</sup>Adjusted for maternal age, booking weight (and ethnicity for “All” women analyses).

P-interaction denotes the P value for the interaction effects between height and ethnicity on plasma glucose.

\*P<0.05; \*\*P<0.01; \*\*\*P<0.001.

1hPG, 1-h plasma glucose; 2hPG, 2-h plasma glucose; a $\beta$ , adjusted beta coefficient; FPG, fasting plasma glucose; P-int, P-interaction
